# Supplementary material for: Investigation of superior sodium storage and reversible Na2S conversion reactions in a porous NiS2@C composite using in operando X-ray diffraction
Source: Royal Society of Chemistry journal article supplement (doi:10.1039/d0ta09801a), 2020-01-01
Supplement: d0ta09801a1.pdf [file d0ta09801a1.pdf]

## Supplementary Information

### Investigation of superior sodium storage and reversible Na<sub>2</sub>S conversion reaction in porous NiS<sub>2</sub>@C composite using *In Operando* X-ray diffraction

Trang Thi Vu,<sup>†,‡</sup> Sohyun Park,<sup>†,‡</sup> Jimin Park,<sup>†,‡</sup> Seokhun Kim,<sup>†</sup> Vinod Mathew,<sup>†</sup> Muhammad H. Alfaruqi,<sup>†,‡</sup> Kwang-Ho Kim,<sup>§</sup> Yang-Kook Sun,<sup>||</sup> Jang-Yeon Hwang,<sup>†,\*</sup> Jaekook Kim<sup>†,\*</sup>

<sup>†</sup> Department of Materials Science and Engineering, Chonnam National University, Gwangju 61186, Republic of Korea

<sup>‡</sup> Department of Teknik Metalurgi, Universitas Sumbawa, Jl. Raya Olat Maras, Sumbawa, Nusa Tenggara Barat, 84371, Indonesia

<sup>§</sup> School of Materials Science and Engineering, Pusan National University, Busan, 46241, Republic of Korea

<sup>||</sup> Department of Energy Engineering, Hanyang University, Seoul 04763, Republic of Korea

#### Author Information

<sup>=</sup> These authors contribute equally to this work.

#### Corresponding Author

\*E-mail: hjy@jnu.ac.kr; jaekook@chonnam.ac.kr

## **Experimental Section**

### **Material preparation:**

*Synthesis of Ni-based MOFs:* In a typical procedure, 1.274 g  $\text{Ni}(\text{NO}_3)_2 \cdot 6\text{H}_2\text{O}$ , 0.512 g trimesic acid, and PVP were mixed and dissolved in a 1:1:1 (water : ethanol : dimethylformamide) mixture. After vigorous stirring for 1 h, the obtained homogeneous solution was transferred to a 40 mL Teflon-lined bomb and pyrolyzed at 150 °C for 16 h. A light green powder of Ni-MOFs was obtained after several times of washing with ethanol followed by drying at 80 °C overnight.

*Fabrication of the p-NiS<sub>2</sub>@C nanoparticles and s-NiS<sub>2</sub>@C spheres:* The Ni-MOFs and sulfur powder were placed together in a tube furnace and pyrolyzed at 450 °C for 2 h under an Ar atmosphere with a ramp rate of 5 °C/min to obtain porous NiS<sub>2</sub>@C(p-NiS<sub>2</sub>@C) nanoparticles. In the comparison, one reference sample of solid NiS<sub>2</sub>@C(s-NiS<sub>2</sub>@C) was prepared using the same procedure while adjusting the annealing conditions of Ni-MOFs to those of the oxidation route (500 °C for 2 h with a ramp rate of 5 °C/min) before the sulfurization stage.

**Material Characterization:** The structural characteristics of the obtained powder were examined by XRD (powder X-ray diffractometer, CCRF, Chonnam National University) with Cu K $\alpha$  radiation ( $\lambda = 1.54056 \text{ \AA}$ ) at a voltage of 60 kV in the  $2\theta$  range of 10–80° with 0.01° steps. The structural morphology and lattice fringes were examined by FE-SEM (S4700, Hitachi) and HRTEM at a voltage of 200 kV (Philips Tecnai F20, at KBSI, Gwangju Center), respectively. XPS (Thermo VG Scientific, Multilab 2000) analysis was performed using Al K $\alpha$  as the X-ray source to determine the oxidation states of the electrode. The utilized spectrometer was calibrated for the binding energy of the C 1s peak (284.8 eV). The structural evolution of p-NiS<sub>2</sub>@C nanospheres in the sodium half-cell was examined by conducting in operando XRD measurements using an X-ray diffractometer (PANalytical, Empyrean) with Mo K $\alpha$  radiation ( $\lambda = 0.70926 \text{ \AA}$ ) under conditions : 60kV - 30mA, the  $2\theta$  range of 4.6° to 34.5°, and step-width 0.0064°. The cell was cycled to the fully discharged and charged states using a portable potentiostat at a constant current density of 0.05 A g<sup>-1</sup>.

**Electrochemical Measurements:** A CR 2032-type half-cell was assembled using the NiS<sub>2</sub> electrode and sodium metal as the counter and reference electrodes, respectively. A 1.0 M solution of

sodium hexafluorophosphate ( $\text{NaPF}_6$ , 99%, Alfa Aesar) in Dimethylglyoxime (DEGDME) was used as the electrolyte for NIBs. The working electrodes were prepared by mixing the active material (80%), Super P (10%), and polyacrylic acid (10%) utilized as a functional binder for transition metal compounds. Distilled water was optimized and added to the resulting powder mixture and transferred to a Spex ball mill for 10 min to obtain a homogeneous slurry, which was subsequently coated onto the copper foil surface using a doctor blade. The coin cell was assembled in an argon-filled glove box using sodium foil and  $\Phi 16$  mm Whatman glass fiber as the separator and 1.0 M  $\text{NaPF}_6$  in DEGDME as the ether-based electrolyte. The  $\text{NiS}_2$  half-cell was operated in a window of 0–2.5 V (vs.  $\text{Na}^+/\text{Na}$ ) at room temperature and various applied current densities. A programmable battery tester (BTS-2004H, Nagano, Japan) and potentiostat/galvanostat (Bio-Logic Science Instruments) were employed for galvanostatic, CV, and PEIS analyses.

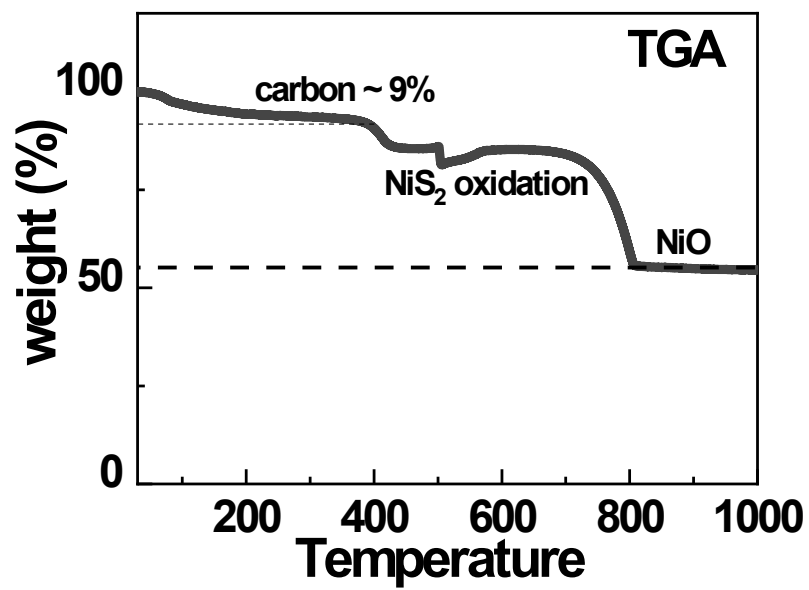

**Fig.S1** TGA curve of p-NiS<sub>2</sub>@C.

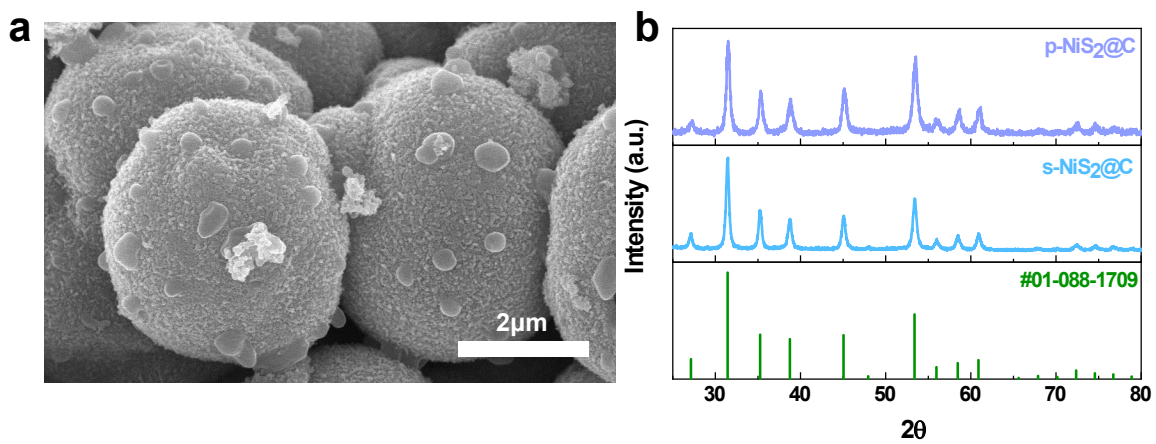

**Fig.S2** (a) SEM image and (b) X-ray diffraction pattern of s-NiS<sub>2</sub>@C, and p-NiS<sub>2</sub>@C (inset is XRD of NiO)

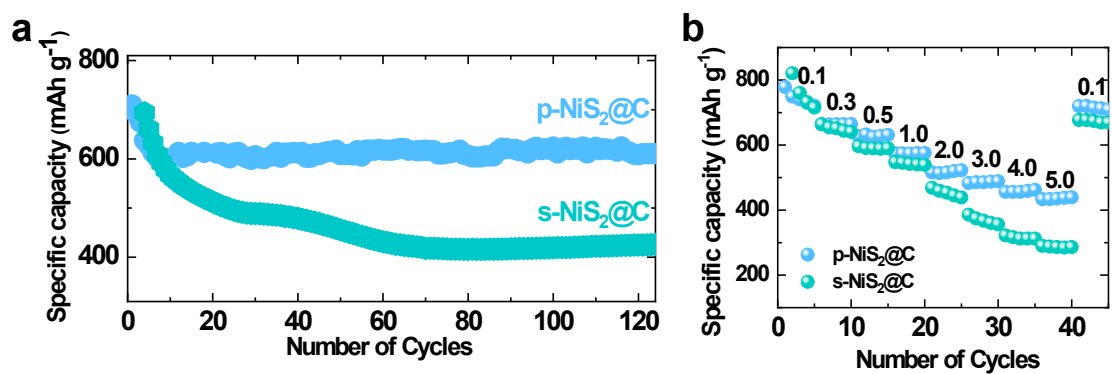

**Fig. S3** (a) Cycle stability performance and (b) Rate performance of solid p-NiS<sub>2</sub>@C and s-NiS<sub>2</sub>@C

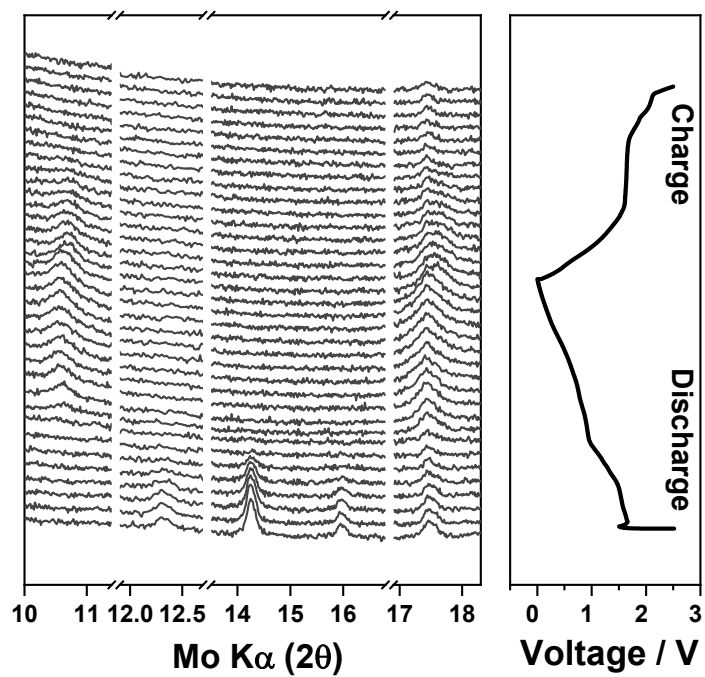

**Fig. S4** In Operando XRD patterns of p-NiS<sub>2</sub>@C

**Table S1.** Comparison of the proposed composite with that of previous studies on NiS<sub>2</sub>

| Materials                             | Carbon content (%) | Voltage range (V) | Electrolyte                                    | Rate performance                            |                                           | Cycling performance                                                 |                                                                        | Ref                                 |
|---------------------------------------|--------------------|-------------------|------------------------------------------------|---------------------------------------------|-------------------------------------------|---------------------------------------------------------------------|------------------------------------------------------------------------|-------------------------------------|
|                                       |                    |                   |                                                | Capacity (mAh g <sup>-1</sup> )             | Current (Ag <sup>-1</sup> )               | Low current                                                         | High current                                                           |                                     |
| porous NiS <sub>2</sub> @C            | 8.5                | 0 – 2.5           | 1M NaPF <sub>6</sub> in DGM                    | 782, 659, 623, 574, 519, 486, 459 and 437   | 0.1, 0.3, 0.5, 1.0, 2.0, 3.0, 4.0 and 5.0 | 848 mAh g <sup>-1</sup> after 50 cycles at 0.1A g <sup>-1</sup>     | Over 700 mAh g <sup>-1</sup> after 500 cycles at 1.0 a g <sup>-1</sup> | This work                           |
| Ultrasmall NiS <sub>2</sub>           | 43.6               | 0 – 3.0           | 1M NaPF <sub>6</sub> in EC/PC (1:1) + 5% FEC   | 540, 505, 475, 450, 370 and 300             | 0.05, 0.1, 0.2, 0.5, 1.0 and 2.0          | 371 mAh g <sup>-1</sup> after 200 cycles at 0.1 A g <sup>-1</sup>   | Below 200 mAh g <sup>-1</sup> after 1000 cycles at 2 A g <sup>-1</sup> | Nanoscale 2019 <sup>1</sup>         |
| NiS <sub>2</sub> /C                   | 17                 | 0.005 – 3.0       | 1M NaPF <sub>6</sub> in DGM                    | 634.2, 585.4, 569.4, 549.5 and 527.8        | 0.1, 0.2, 0.5, 1.0 and 2.0                | 848 mAh g <sup>-1</sup> after 100 cycles at 0.1 A g <sup>-1</sup>   | 530mAh g <sup>-1</sup> at 2.0 Ag <sup>-1</sup> after 300 cycles        | JMCA 2018 <sup>2</sup>              |
| NiS <sub>2</sub> /PCF                 | 61.7               | 0.01 – 3.0        | 1M NaClO <sub>4</sub> in EC/PC (1:1) + 2 % FEC | 580, 516, 450, 391, 347, 302 and 245        | 0.087, 0.16, 0.43, 0.87, 1.6, 4.3 and 8.7 | 561 mAh g <sup>-1</sup> after 300 cycles at 0.087 A g <sup>-1</sup> | 275 mAh g <sup>-1</sup> after 5000 cycles at 4.3 A g <sup>-1</sup>     | Adv. Energy.Mater 2018 <sup>3</sup> |
| Pomegranate NiS <sub>2</sub> /NC      | 25.7               | 0.005 – 3.0       | 1M NaClO <sub>4</sub> in EC/PC (1:1) + 5 % FEC | 528.3, 513.4, 452.2, 410.1, 343.5 and 294.4 | 0.1, 0.5, 1.0, 1.5, 2.0 and 3.0           | 505.7 mAh g <sup>-1</sup> after 100 cycles at 0.1A g <sup>-1</sup>  | 356.2 mAh g <sup>-1</sup> after 300 cycles at 0.5A g <sup>-1</sup>     | JMCA 2018 <sup>4</sup>              |
| Nickel sulfide-embedded carbon matrix | 51.3               | 0 – 3.0           | 1M NaClO <sub>4</sub> in EC/PC (1:1) + 5 % FEC | 680, 630, 580, 520, 410, 310 and 230        | 0.2, 0.5, 1,2, 5, 10 and 15               | 650 mAh g <sup>-1</sup> after 200 cycles at 0.5 A g <sup>-1</sup>   | 300 mAh g <sup>-1</sup> after 800 cycles at 1 A g <sup>-1</sup>        | ESM 2020 <sup>5</sup>               |
| NiS <sub>2</sub> decorated withCarbon | 50.6               | 0.01 – 3.0        | 1M NaClO <sub>4</sub> in PC + 5 % FEC          | 694, 671, 670, 631, 555 and 448             | 0.1, 0.2, 0.4, 0.8 and 1.6                | 580.8 mAh g <sup>-1</sup> after 100 cycles at 0.1 A g <sup>-1</sup> | -                                                                      | Adv.Funt.Mater 2018 <sup>6</sup>    |
| Mesoporous NiS <sub>2</sub>           | -                  | 0.4 – 2.9         | 1M NaClO <sub>4</sub> in DGM                   | 681, 490, 420 and 253                       | 0.3, 1.0, 2.0 and 5.0                     | 692 mAh g <sup>-1</sup> after 100 cycles at 0.1 A g <sup>-1</sup>   | 319 mAh g <sup>-1</sup> after 1000 cycles at 0.5 A g <sup>-1</sup>     | Small 2017 <sup>7</sup>             |

- 1 W. Zhao, S. Ci, X. Hu, J. Chen and Z. Wen, *Nanoscale*, 2019, **11**, 4688–4695.
- 2 R. Bi, C. Zeng, H. Huang, X. Wang and L. Zhang, *J. Mater. Chem. A*, 2018, **6**, 14077–14082.
- 3 Q. Chen, S. Sun, T. Zhai, M. Yang, X. Zhao and H. Xia, *Adv. Energy Mater.*, 2018, **8**, 1–9.
- 4 J. Li, J. Li, D. Yan, S. Hou, X. Xu, T. Lu, Y. Yao, W. Mai and L. Pan, *J. Mater. Chem. A*, 2018, 6595–6605.
- 5 S. Fan, S. Huang, Y. Chen, Y. Shang, Y. Wang, D. Kong, M. E. Pam, L. Shi, Y. W. Lim, Y. Shi and H. Y. Yang, *Energy Storage Mater.*, 2019, **23**, 17–24.
- 6 G. Zhao, Y. Zhang, L. Yang, Y. Jiang, Y. Zhang, W. Hong, Y. Tian, H. Zhao, J. Hu, L. Zhou, H. Hou, X. Ji and L. Mai, *Adv. Funct. Mater.*, 2018, **28**, 1–11.
- 7 R. Sun, S. Liu, Q. Wei, J. Sheng, S. Zhu, Q. An and L. Mai, *Small*, 2017, **13**, 1–8.
